# Supplementary material for: CBLB ablation with CRISPR/Cas9 enhances cytotoxicity of human placental stem cell-derived NK cells for cancer immunotherapy
Source: PubMed Central journal article supplement — J Immunother Cancer. 2021 Mar 19;9(3):e001975. doi: 10.1136/jitc-2020-001975 (PMC7986888; doi:10.1136/jitc-2020-001975), 2021-03-19
Supplement: jitc-2020-001975supp001.pdf [file jitc-2020-001975supp001.pdf]

## 1 SUPPLEMENTARY MATERIALS

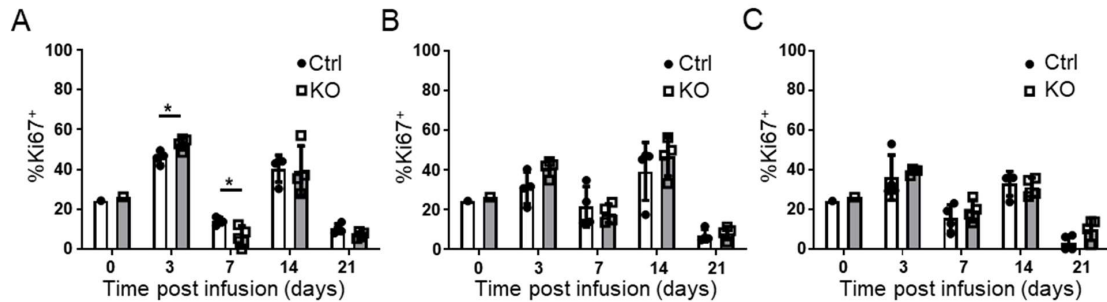

2

3 **Supplemental Figure 1. *CBLB* KO PNK cells proliferate *in vivo*.** The proportion of PNK cells  
 4 expressing the proliferation marker Ki67 in donor cells isolated from bone marrow (A), spleen  
 5 (B), and peripheral blood (C). \* p<0.05

6

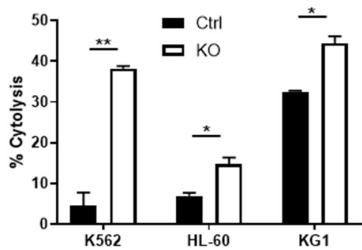

7

8 **Supplemental Figure 2. *CBLB* KO PNK cells demonstrate enhanced *ex vivo* cytotoxicity.**  
 9 *CBLB* KO (KO) or control (Ctrl) PNK cells were injected intravenously (i.v.) into NSG mice one  
 10 day after intraperitoneal (i.p.) Busulfan treatment. rhIL-15 was administered i.p. every two days  
 11 until day 12. Animals were sacrificed on day 14 and hCD45+ cells were isolated from mouse liver  
 12 for *ex vivo* cytotoxicity against K562, HL-60 and KG1 at 1.25: 1 effector to target ratio. Data were  
 13 collected using flow cytometry at 4 hours after co-culture of PNK and target cells (n=2). \* p<0.05,  
 14 \*\* p<0.01
